# Supplementary material for: Raised Late Pregnancy Glucose Concentrations in Mice Carrying Pups With Targeted Disruption of H19Δ13
Source: PubMed Central journal article supplement — Diabetes. 2009 Sep 30;59(1):282–6. doi: 10.2337/db09-0757 (PMC2797934; doi:10.2337/db09-0757), 2009-09-30
Supplement: supp_db09-0757_db09-0757_Online_appendix.pdf [file supp_db09-0757_db09-0757_Online_appendix.pdf]

## ONLINE APPENDIX

### **Raised Late Pregnancy Glucose Concentrations in Mice carrying Pups with Targeted Disruption of *H19*<sup>Δ13</sup>**

Running title: *H19*<sup>Δ13+/-</sup> pups & Maternal Glucose Levels

**Clive J. Petry<sup>1</sup>, Mark L. Evans<sup>2,3</sup>, Dianne L. Wingate<sup>1</sup>, Ken K. Ong<sup>1,4</sup>, Wolf Reik<sup>5,6</sup>, Miguel Constância<sup>3,5,6,7</sup>, David B. Dunger<sup>1,3</sup>**

<sup>1</sup>Department of Paediatrics, University of Cambridge, Cambridge, U.K.; <sup>2</sup>Department of Medicine, University of Cambridge, Cambridge, U.K.; <sup>3</sup>Institute of Metabolic Science, University of Cambridge, Cambridge, U.K.; <sup>4</sup>M.R.C. Epidemiology Unit, Addenbrooke's Hospital, Cambridge, U.K.; <sup>5</sup>Babraham Institute, Babraham, U.K.; <sup>6</sup>Centre for Trophoblast Research, University of Cambridge, Cambridge, UK; <sup>7</sup>Department of Obstetrics & Gynaecology, University of Cambridge, Cambridge, U.K.

**Table SD1** Body weights of unborn pups on days 16 and 18 of pregnancy. Due to the effects of imprinting weights of  $H19^{I3+/-}$  pups were indistinguishable from those of wild type ( $H19^{I3+/+}$ ) pups and so are presented together. At day 16 there was a significant correlation between litter total fetal weights and areas under the mothers glucose curves ( $r=0.88$ ;  $p=0.04$ ). This relationship was no longer statistically significant on day 18 ( $r=0.44$ ;  $p=0.07$ ). Data are mean (SD).

| Day of Pregnancy | Genetic Status of Pups        | n   | Weight (g)    |
|------------------|-------------------------------|-----|---------------|
| 16               | $H19^{I3+/+}$ & $H19^{I3+/-}$ | 89  | 0.680 (0.118) |
|                  | $H19^{I3-/+}$                 | 29  | 0.801 (0.142) |
| 18               | $H19^{I3+/+}$ & $H19^{I3+/-}$ | 104 | 1.143 (0.135) |
|                  | $H19^{I3-/+}$                 | 34  | 1.410 (0.206) |

**Table SD2** Mean (95 % confidence interval) areas under the maternal GTT curves on days 16 and 18 of pregnancy. There was a significant association with both the group ( $p=0.002$ ) and the day of pregnancy ( $p=0.014$ ) on the areas, along with a near significant interaction between the two ( $p=0.07$ ). This statistical model explained 33.8 % of the variation in the areas under the GTT curves around this stage of pregnancy.

| Group        | Day of Pregnancy | n | Mean (95 % Confidence Interval) Area under the GTT Curve (mmol.min/L) |
|--------------|------------------|---|-----------------------------------------------------------------------|
| Control      | 16               | 9 | 1386 (1235~1537)                                                      |
| Experimental | 16               | 8 | 1780 (1619~1940)                                                      |
| Control      | 18               | 9 | 1333 (1182~1484)                                                      |
| Experimental | 18               | 9 | 1444 (1293~1595)                                                      |
